# Supplementary material for: Design, postpolymerization conjugation and self-assembly of a di-block copolymer-based prodrug for tumor intracellular acid-triggered DOX release
Source: Royal Society of Chemistry journal article supplement (doi:10.1039/c9tb01511f), 2019-01-01
Supplement: c9tb01511f1.pdf [file c9tb01511f1.pdf]

### Supporting Information

#### Calculation of DP and $M_{n,NMR}$ from the NMR results.

The number-average molecular weight ( $M_{n,NMR}$ ) and degree of polymerization (DP) of GMA unit were calculated from the integral values of the methylene of PEG chain proton signal ( $4 \times 113$  protons) in the range of 3.74-3.48 ppm and that of the methylene in epoxide ( $1 \times DP$  protons) in the range of 3.36-3.16 ppm.

Taking PEG-PGMA<sub>51</sub> as an example, amplifying the integral of the methylene signal (3.74-3.48 ppm) of PEG chain proton to 452 (the methylene proton number on the PEG), the integral of the methylene in epoxide (3.36-3.16 ppm) was 51.36, meaning there was 51 epoxide groups in a PEG-PGMA copolymer. So the DP of GMA should be 51 in the PEG-PGMA<sub>51</sub>. The  $M_{n,NMR}$  of the PEG-PGMA<sub>51</sub> could be calculated using the following formulation:  $5000+51 \times 142=12242$ .

#### Calculation of drug content from the <sup>1</sup>H NMR results.

The degree of DOX conjugation could be calculated with the following formulation:

$$\text{degree of DOX conjugation} = \frac{y}{x + y} \times 100\%$$

where x is the integral of H signal at 8.22~8.50 ppm (-CH=N-), y is the integral of H signal at 9.93~10.10 ppm (-CHO).

Taking the PEG-P(GMA-CBA)<sub>51</sub>-DOX as an example:  $x=0.47$ ,  $y=1$ . The degree of

$$\text{DOX conjugation was calculated as } \frac{0.47}{1 + 0.47} \times 100\% = 32\%$$

$$\text{So the drug content (wt\%)} = \frac{n \cdot 32\% \cdot M_{DOX}}{n \cdot (M_{GMA} + M_{CBA}) + n \cdot 32\% \cdot M_{DOX} + M_{PEG}} \times 100\% = 32.47\%$$

where n is the degree of polymerization of the relevant polymer, and  $M_{DOX}$ ,  $M_{GMA}$ ,  $M_{CBA}$ , and  $M_{PEG}$  is the molar mass of DOX, GMA, CBA and PEG, respectively.

#### Calculation of drug contents from the UV-vis results.

5.0 mg of PEG-P(GMA-CBA)<sub>n</sub>-DOX was dissolved in 15 mL of DMSO. The solution was measured by UV-vis spectrometry at 480 nm, and the amount of DOX was calculated from a standard calibration curve obtained from a series of DOX solution in DMSO, as following:

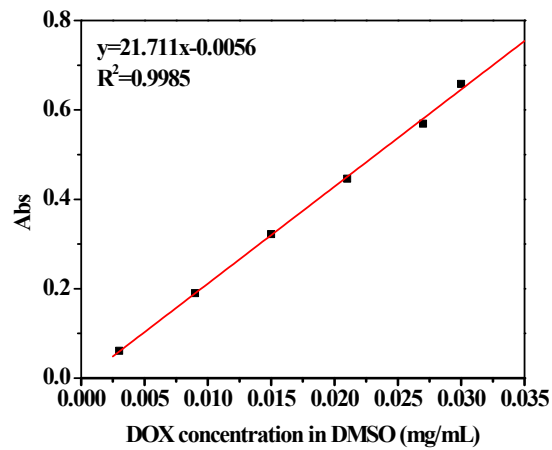

Then the drug content was calculated, as following:

$$\text{drug content (wt\%)} = \frac{W_{DOX}}{W_{PEG-P(GMA-CBA)-DOX}} \times 100\%$$

where  $W_{DOX}$  is the weight of DOX in PEG-P(GMA-CBA)-DOX, and  $W_{PEG-P(GMA-CBA)-DOX}$  is the weight of PEG-P(GMA-CBA)-DOX.

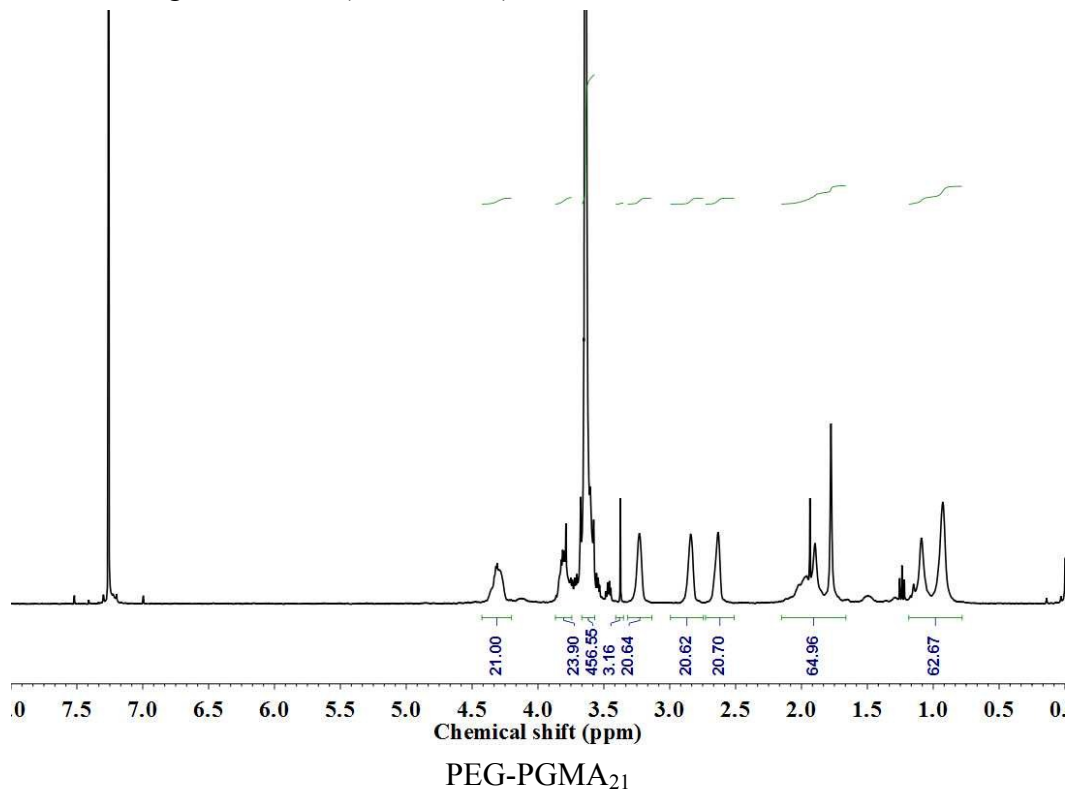

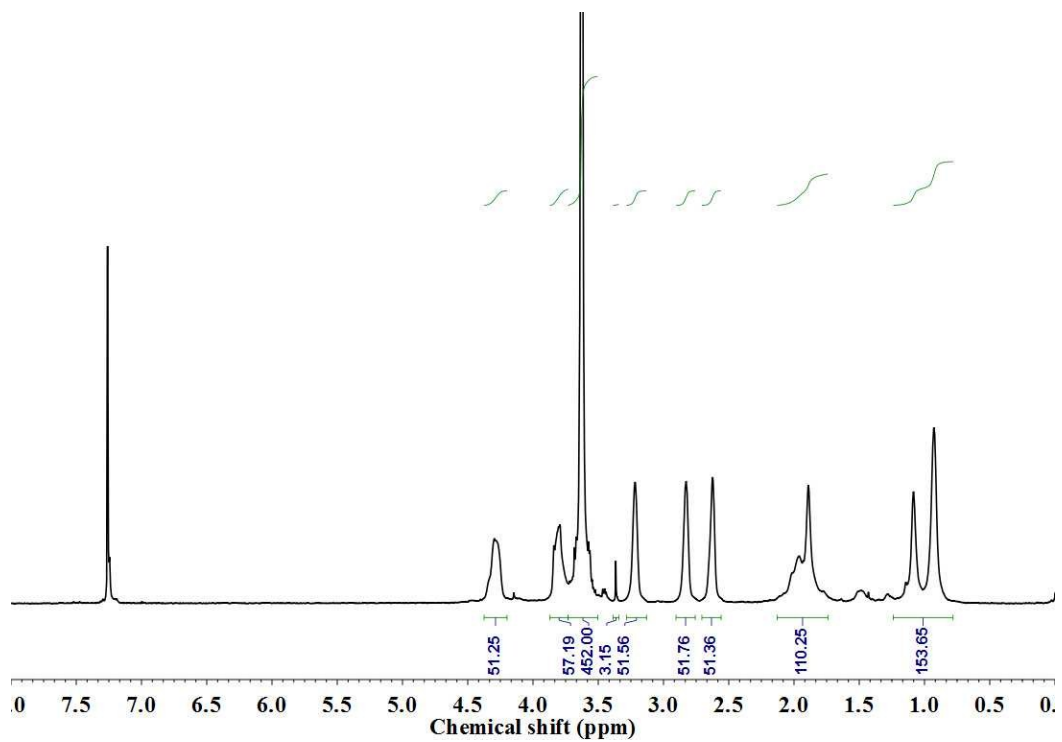

PEG-PGMA<sub>51</sub>

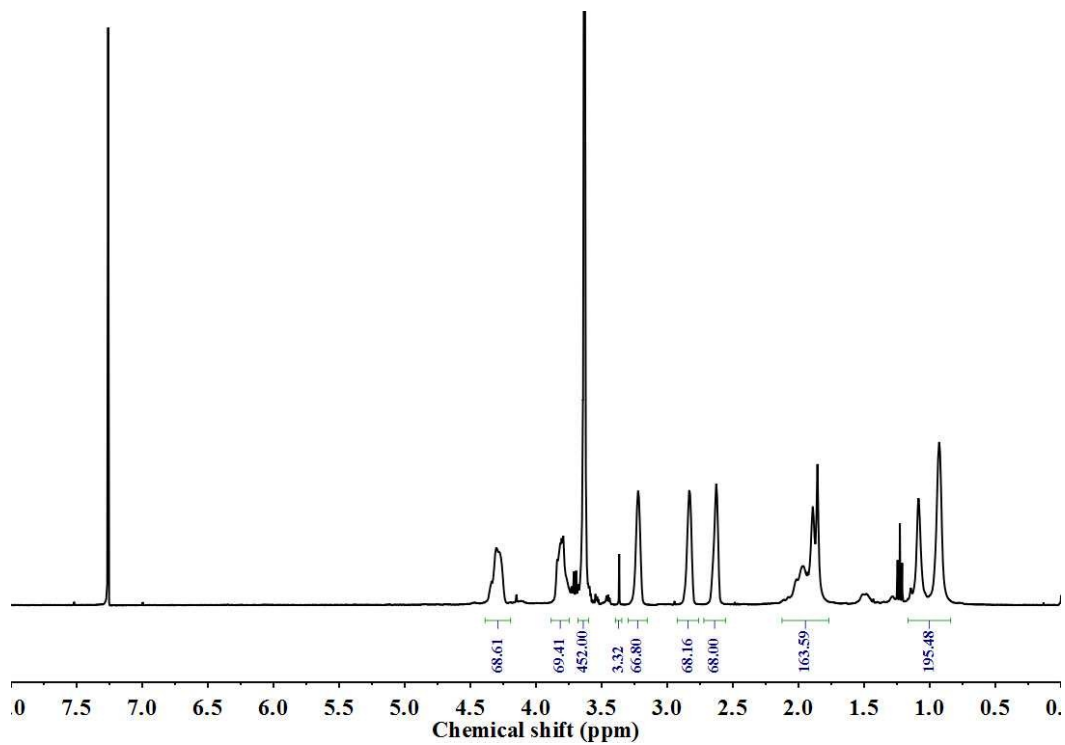

PEG-PGMA<sub>68</sub>

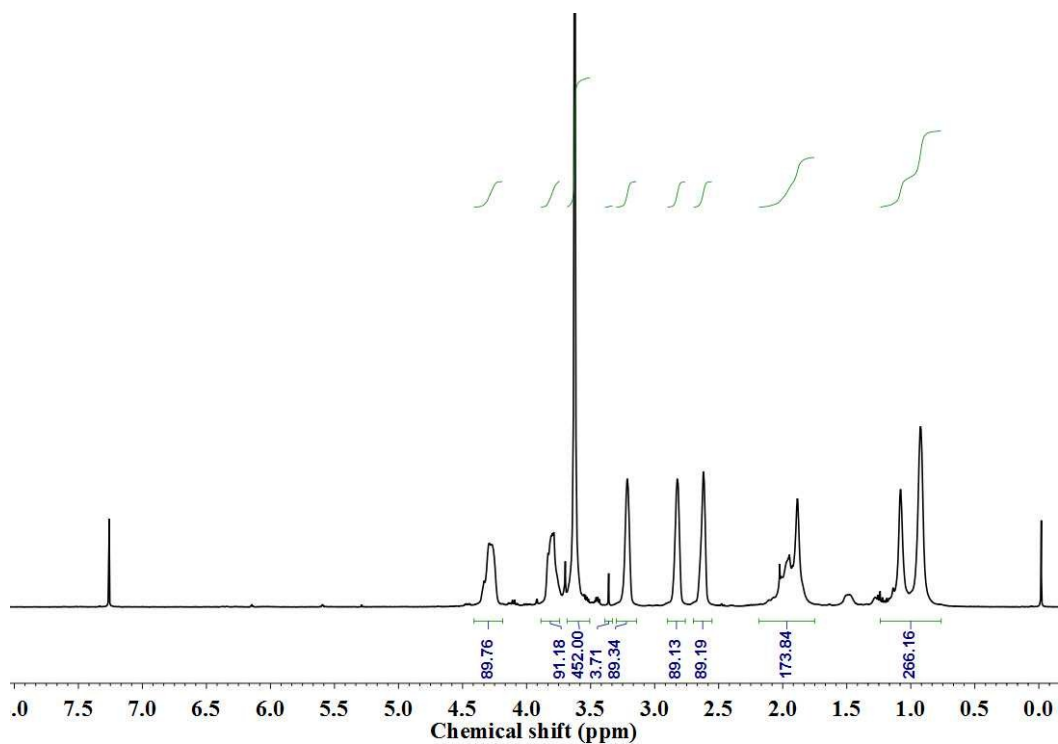

PEG-PGMA<sub>89</sub>

**Fig. S1.** <sup>1</sup>H NMR of PEG-PGMA in CDCl<sub>3</sub>.

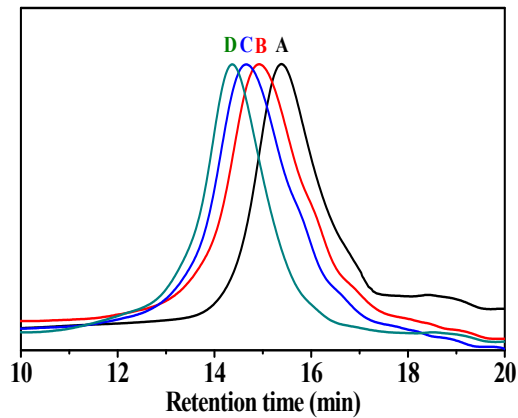

**Fig. S2.** GPC traces of the di-block copolymers: (A) PEG-PGMA<sub>21</sub>, (B) PEG-PGMA<sub>51</sub>, (C) PEG-PGMA<sub>68</sub>, (D) PEG-PGMA<sub>89</sub>.

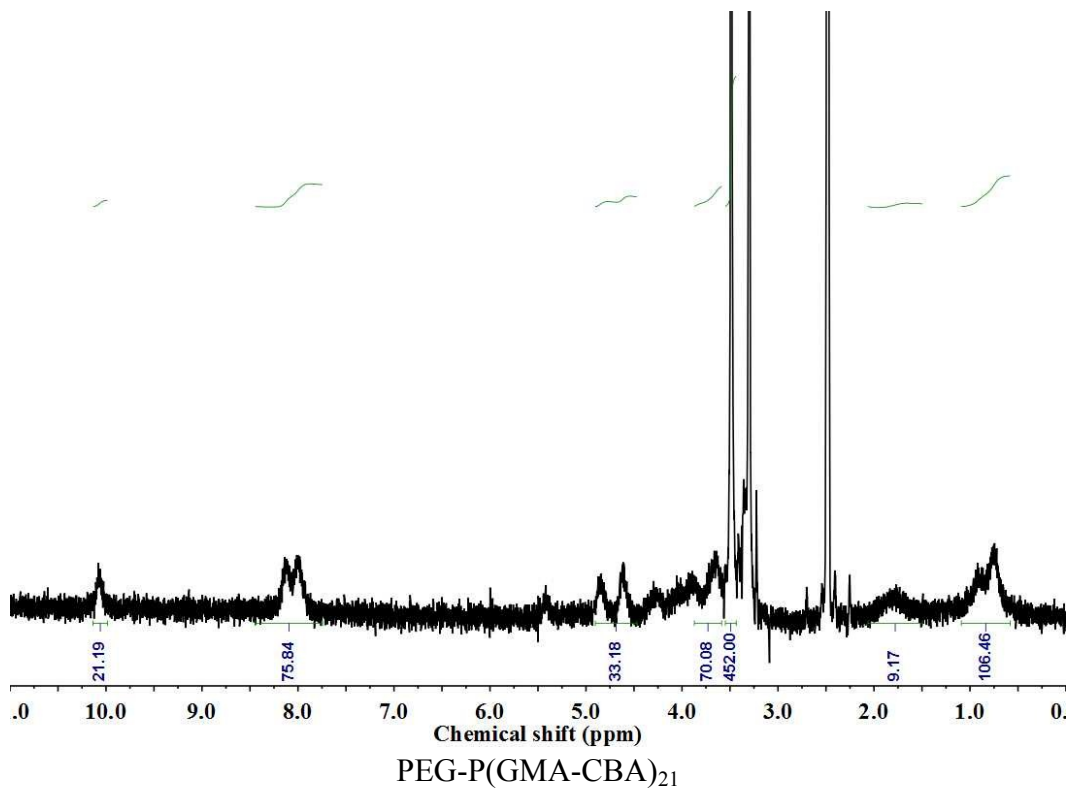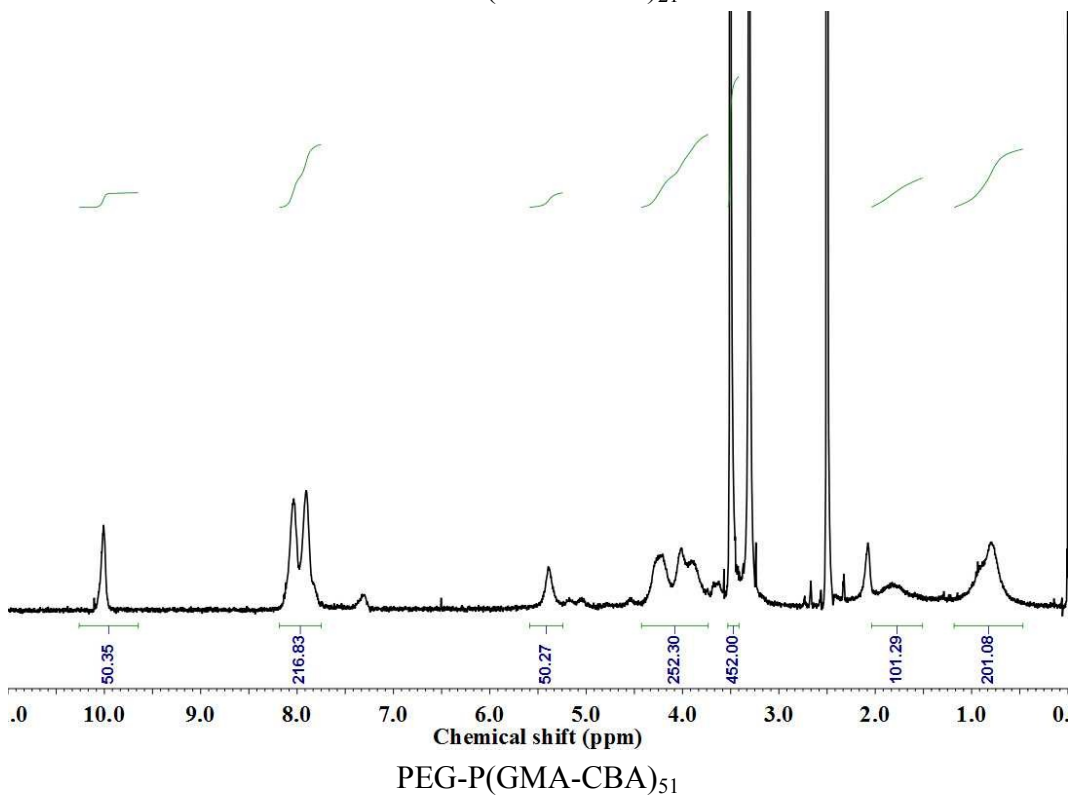

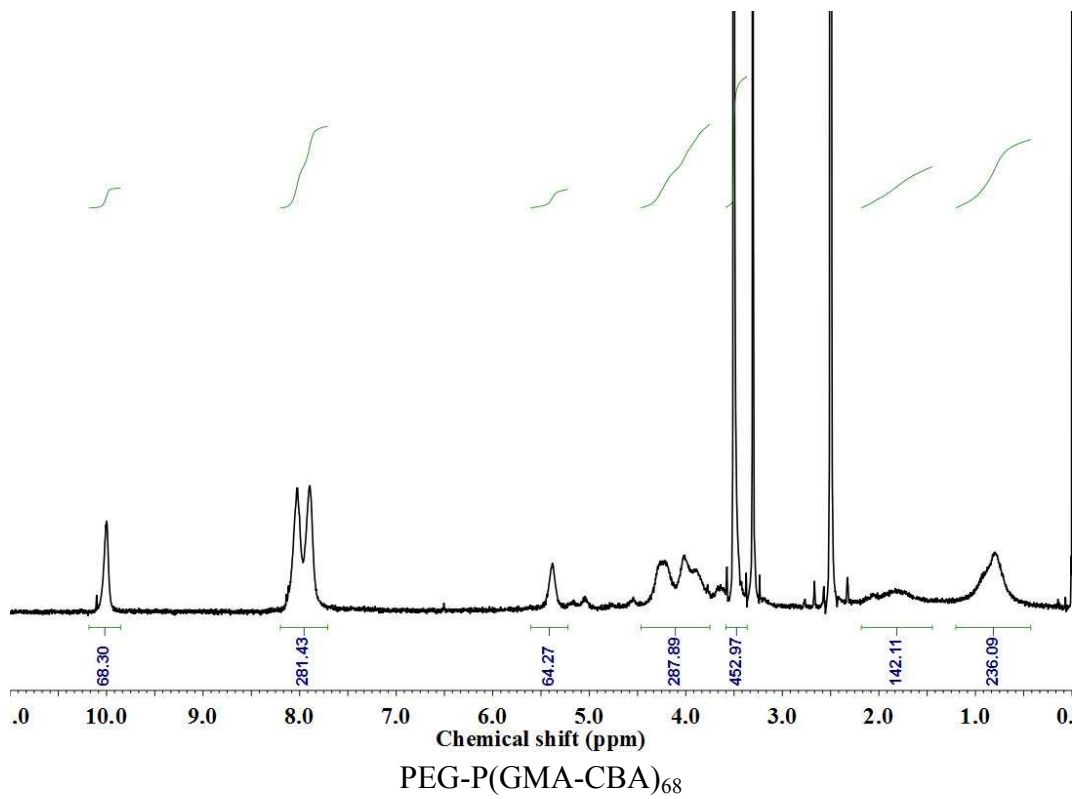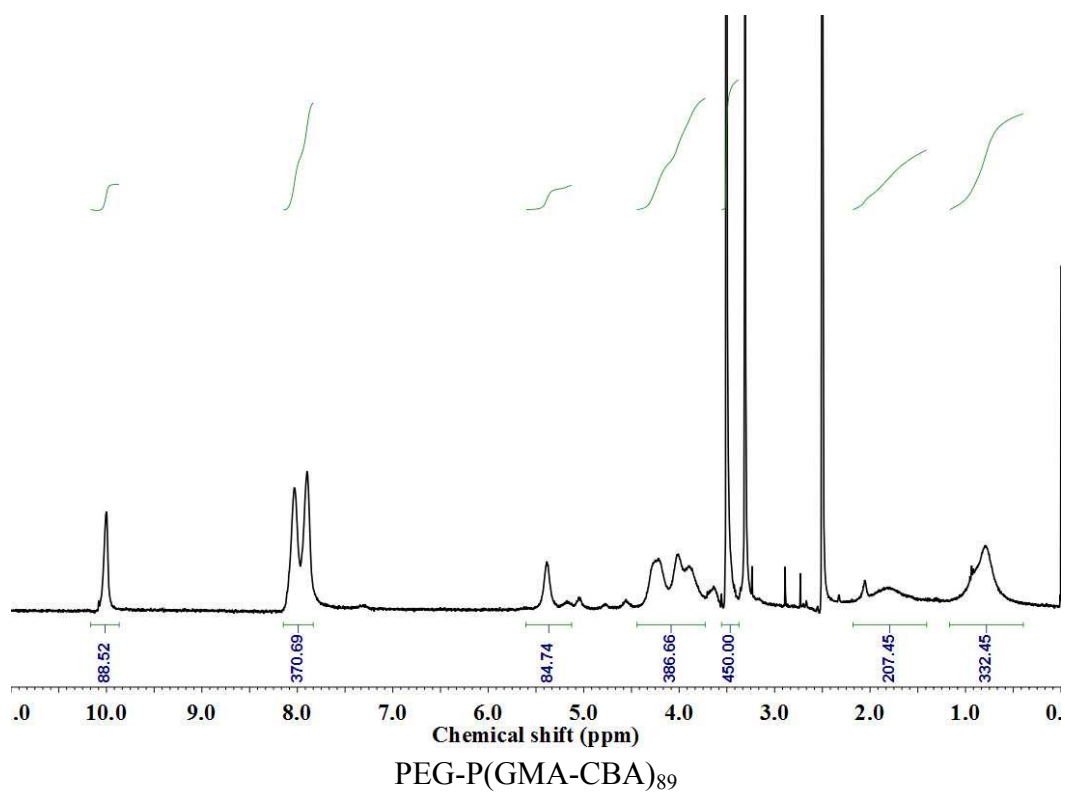

**Fig. S3.** <sup>1</sup>H NMR of PEG-P(GMA-CBA) in DMSO-d<sub>6</sub>.

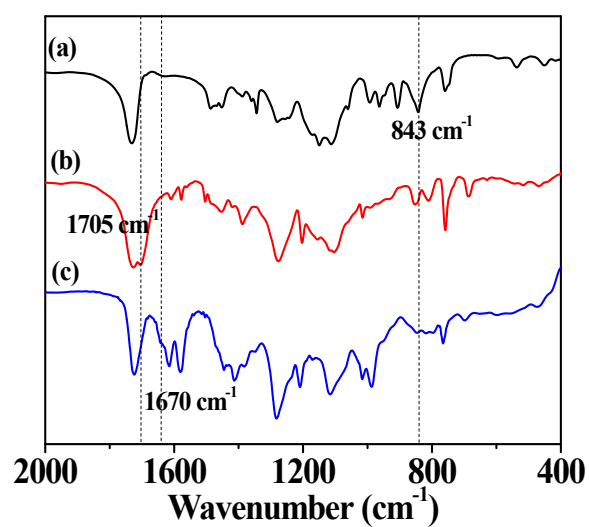

**Fig. S4.** FT-IR spectra of (a) PEG-PGMA<sub>51</sub>, (b) PEG-P(GMA-CBA)<sub>51</sub> and (c) PEG-P(GMA-CBA)<sub>51</sub>-DOX.

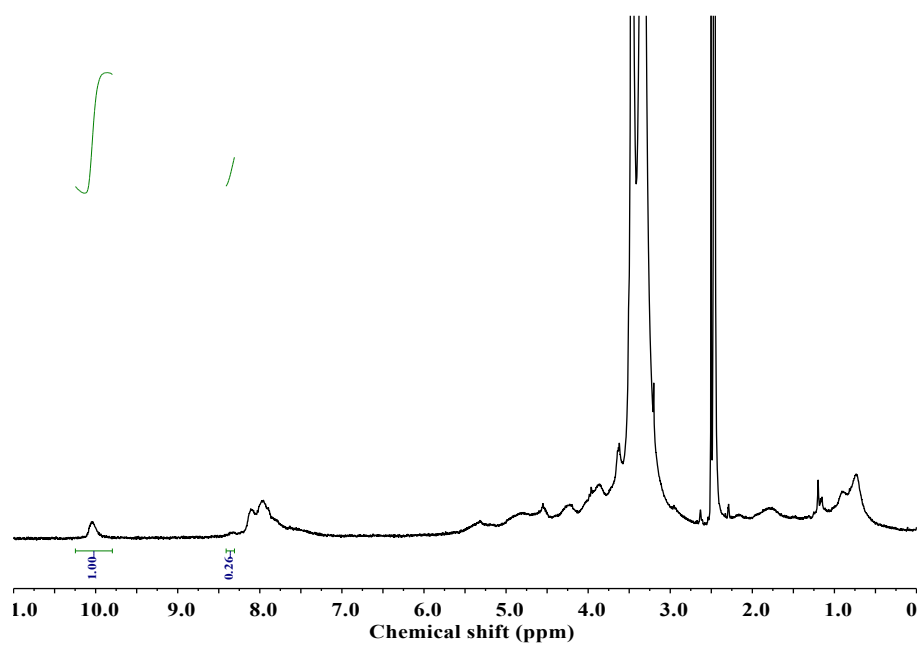

PEG-P(GMA-CBA)<sub>21</sub>-DOX

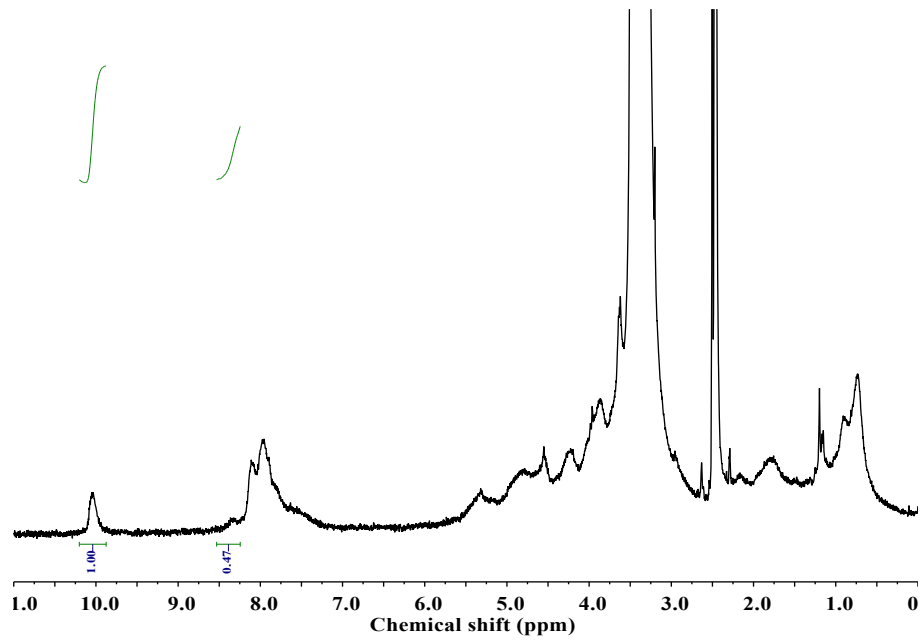

PEG-P(GMA-CBA)<sub>51</sub>-DOX

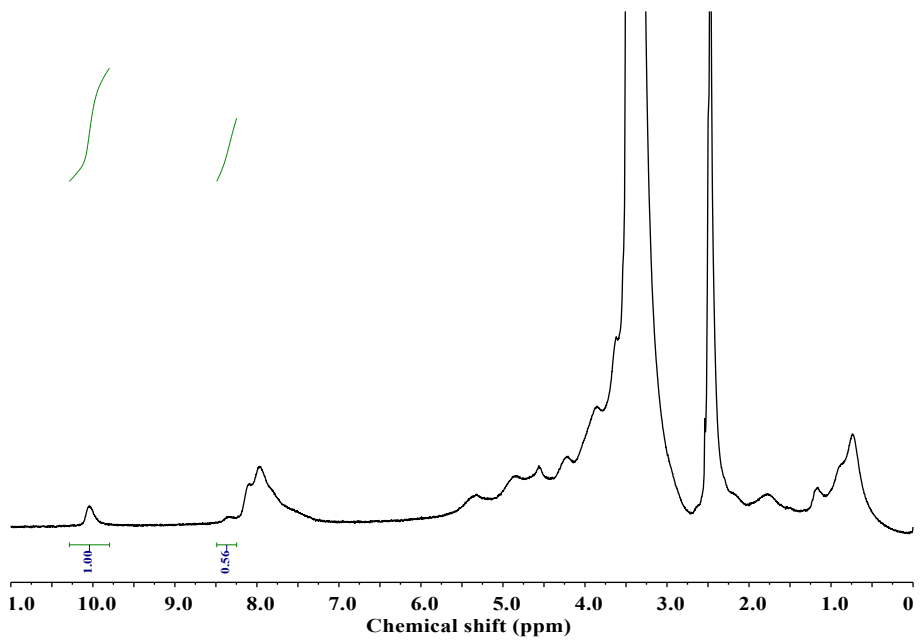

PEG-P(GMA-CBA)<sub>68</sub>-DOX



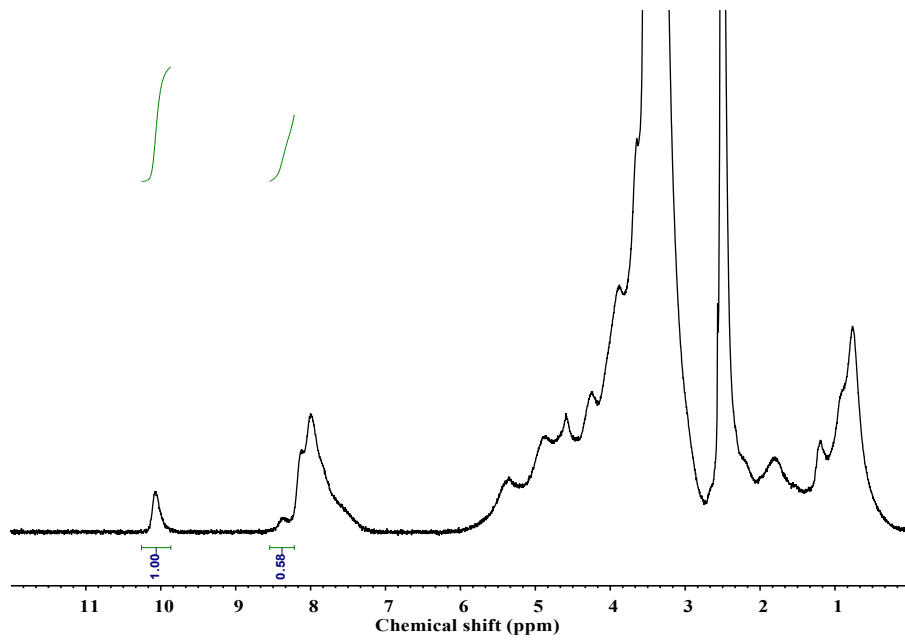

PEG-P(GMA-CBA)<sub>89</sub>-DOX

Fig. S5. <sup>1</sup>H NMR of PEG-P(GMA-CBA)<sub>89</sub>-DOX in DMSO-*d*<sub>6</sub>.

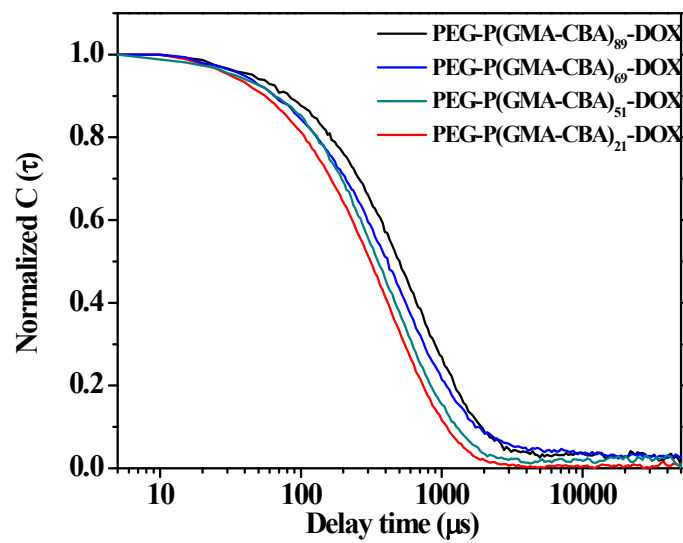

Fig. S6. Normalized ACF curves of the proposed polyprodrug nanoparticles.

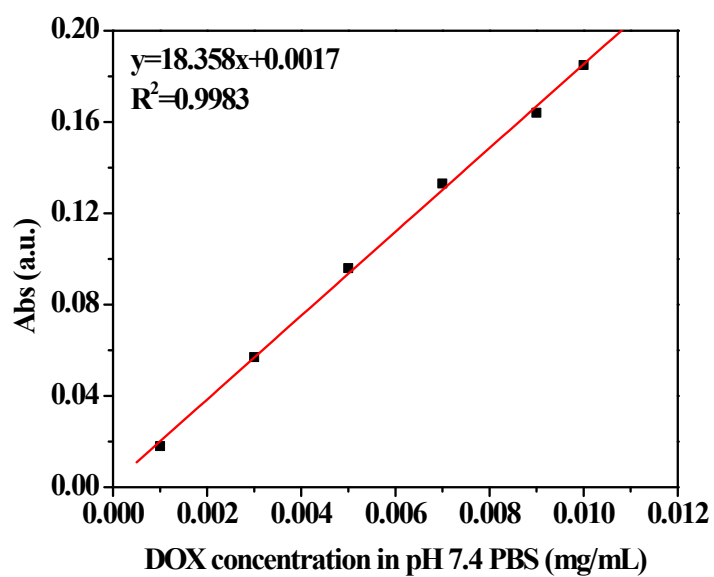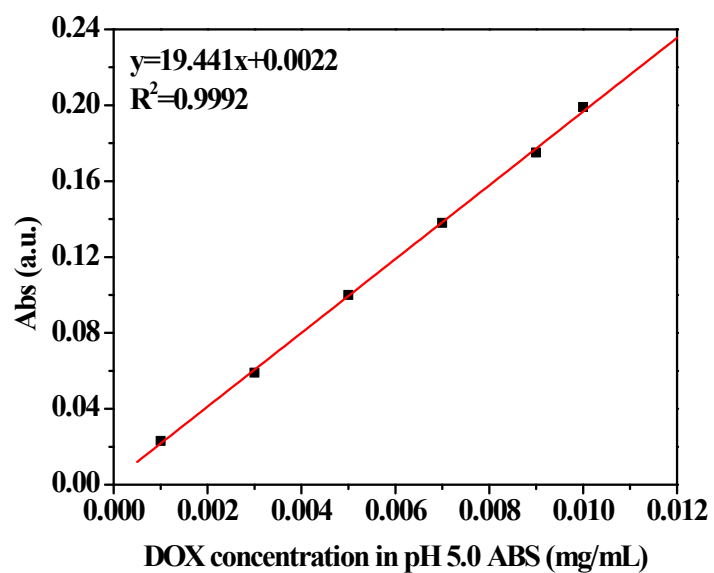

**Fig. S7.** The standard calibration curves of DOX in pH 7.4 PBS and pH 5.0 ABS measured by UV-vis spectra at 480 nm.
